# Supplementary material for: 8p23.1 duplication syndrome: narrowing of critical interval to 1.80 Mbp
Source: PubMed Central journal article supplement (PMC4268894; doi:10.1186/s13039-014-0094-3), 2014-12-09
Supplement: 13039_2014_94_MOESM1_ESM.pdf [file 13039_2014_94_MOESM1_ESM.pdf]

Supplemental table 1: Origin of alleles in the duplicated region of 8p23.1

| SNP        | Chr | SNP position | allele propositus | allele mother | allele father | duplicated allele origin |
|------------|-----|--------------|-------------------|---------------|---------------|--------------------------|
| rs12543276 | 8   | 9178921      | AAb               | AA            | BB            | maternal                 |
| rs11778929 | 8   | 9184529      | aBB               | BB            | AA            | maternal                 |
| rs10106829 | 8   | 9184628      | aBB               | BB            | AA            | maternal                 |
| rs6999153  | 8   | 9193501      | AAb               | AA            | BB            | maternal                 |
| rs12235038 | 8   | 9237403      | AAb               | AA            | BB            | maternal                 |
| rs4240625  | 8   | 9242557      | aBB               | BB            | AA            | maternal                 |
| rs17730481 | 8   | 9276163      | aBB               | BB            | AA            | maternal                 |
| rs10105543 | 8   | 9323515      | aBB               | BB            | AA            | maternal                 |
| rs7007562  | 8   | 9328926      | AAb               | AA            | BB            | maternal                 |
| rs7819054  | 8   | 9336714      | AAb               | AA            | BB            | maternal                 |
| rs7830939  | 8   | 9380132      | aBB               | BB            | AA            | maternal                 |
| rs9644677  | 8   | 9411808      | AAb               | AA            | BB            | maternal                 |
| rs9329203  | 8   | 9412153      | AAb               | AA            | BB            | maternal                 |
| rs6990097  | 8   | 9412857      | AAb               | AA            | BB            | maternal                 |
| rs10110146 | 8   | 9685362      | AAb               | AA            | BB            | maternal                 |
| rs4841239  | 8   | 9692825      | aBB               | BB            | AA            | maternal                 |
| rs7015101  | 8   | 9718278      | AAb               | AA            | BB            | maternal                 |
| rs661310   | 8   | 9787808      | AAb               | AA            | BB            | maternal                 |
| rs615171   | 8   | 9796189      | aBB               | BB            | AA            | maternal                 |
| rs13273152 | 8   | 9831907      | aBB               | BB            | AA            | maternal                 |
| rs7813389  | 8   | 9834862      | AAb               | AA            | BB            | maternal                 |
| rs17737355 | 8   | 9838936      | AAb               | AA            | BB            | maternal                 |
| rs537231   | 8   | 9839731      | aBB               | BB            | AA            | maternal                 |
| rs7815168  | 8   | 9847606      | aBB               | BB            | AA            | maternal                 |
| rs4517127  | 8   | 9862430      | aBB               | BB            | AA            | maternal                 |
| rs6987670  | 8   | 9883177      | aBB               | BB            | AA            | maternal                 |
| rs11787370 | 8   | 10030902     | aBB               | BB            | AA            | maternal                 |
| rs11993663 | 8   | 10032894     | aBB               | BB            | AA            | maternal                 |
| rs1905630  | 8   | 10033264     | aBB               | BB            | AA            | maternal                 |
| rs7820236  | 8   | 10044801     | AAb               | AA            | BB            | maternal                 |
| rs11249973 | 8   | 10046638     | AAb               | AA            | BB            | maternal                 |
| rs17748464 | 8   | 10050618     | aBB               | BB            | AA            | maternal                 |
| rs6982806  | 8   | 10056664     | AAb               | AA            | BB            | maternal                 |
| rs10097315 | 8   | 10060638     | AAb               | AA            | BB            | maternal                 |
| rs7832976  | 8   | 10065961     | AAb               | AA            | BB            | maternal                 |
| rs4380891  | 8   | 10338924     | aBB               | BB            | AA            | maternal                 |
| rs11250018 | 8   | 10340111     | AAb               | AA            | BB            | maternal                 |
| rs6601469  | 8   | 10343863     | aBB               | BB            | AA            | maternal                 |
| rs13282174 | 8   | 10345753     | aBB               | BB            | AA            | maternal                 |
| rs4392860  | 8   | 10356449     | aBB               | BB            | AA            | maternal                 |
| rs10086002 | 8   | 10391917     | aBB               | BB            | AA            | maternal                 |
| rs7011457  | 8   | 10407928     | AAb               | AA            | BB            | maternal                 |
| rs4841380  | 8   | 10418039     | aBB               | BB            | AA            | maternal                 |
| rs9329228  | 8   | 10482372     | AAb               | AA            | BB            | maternal                 |
| rs7386213  | 8   | 10503525     | AAb               | AA            | BB            | maternal                 |
